# Supplementary material for: Predictability of Extreme Events in Social Media
Source: PubMed Central journal article supplement (PMC4219754; doi:10.1371/journal.pone.0111506), 2014-11-04

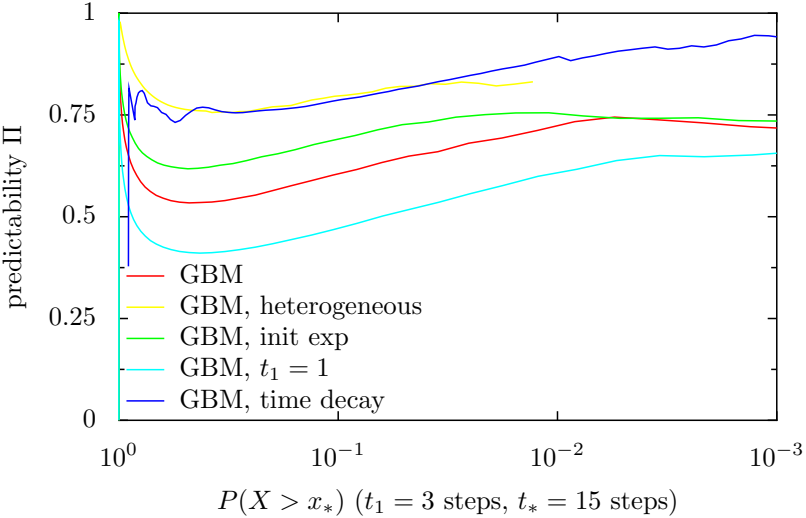

Supplement: pone.0111506.s002.pdf [file pone.0111506.s002.pdf]
